# Supplementary material for: Beneficial Effect of Vitamin D on Non-Alcoholic Fatty Liver Disease (NAFLD) Progression in the Zebrafish Model
Source: MDPI journal article supplement (doi:10.3390/nu15061362), 2023-03-10
Supplement: s1 [file s1]

**Beneficial effect of vitamin D on non-alcoholic fatty liver disease (NAFLD)  
progression in the zebrafish model**

Lihi Grinberg<sup>1¶</sup>, Fadwa Dabbah Assadi<sup>1¶</sup>, Gideon Baum<sup>1</sup>, Romy Zemel<sup>2</sup>, Ran Tur-Kaspa<sup>1,3</sup>, Chen Shochat<sup>1</sup>, David Karasik<sup>1&\*</sup>, Marcela V Karpuj<sup>1,4&\*</sup>

<sup>1</sup> Azrieli Faculty of Medicine, Bar-Ilan University, Safed, Israel

<sup>2</sup> Felsenstein Medical Research Center, Petah Tikva, Israel.

<sup>3</sup> Liver Institute, Rabin Medical Center, Petah Tikva, Israel

<sup>4</sup> Department of Biotechnology Engineering, Braude College, Karmiel, Israel.

## Supplementary Figures and Tables

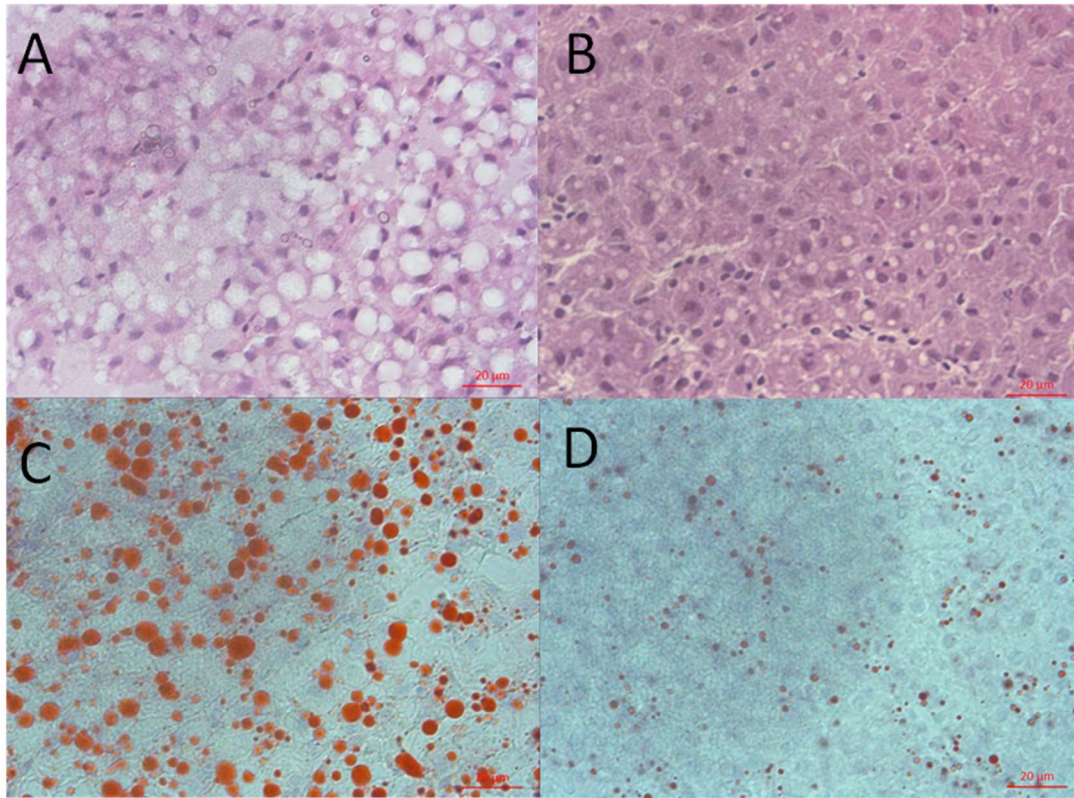

**Supplementary Figure S1. Histological characterization of the various Zebrafish NAFLD model.** Representative images of liver histological sections of adult zebrafish after 3 months of overfeeding. (A) overfed liver stained with hematoxylin and eosin (H&E), (B) control liver stained with H&E, (C) overfed liver stained with Oil Red O (ORO), (D) control liver stained with ORO. Magnification x40, Scale bar 20 µm.

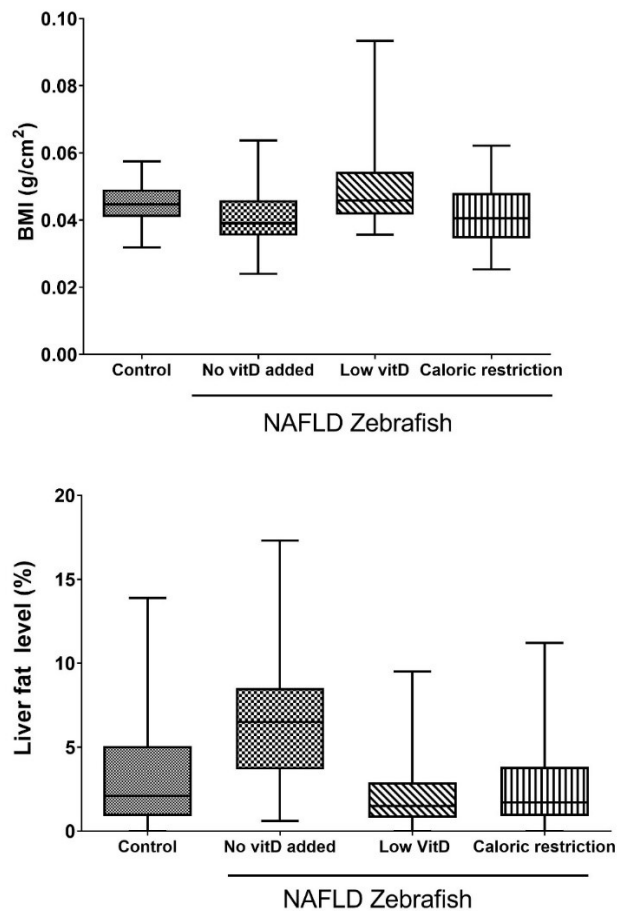

**Supplementary Figure S2. BMI and fat levels in adult NAFLD zebrafish liver after feeding with:** no VitD added (3 meal/day/3L tank), low VitD (3 meal/day/3L tank with 0.049  $\mu$ g VitD per meal), caloric restriction diet (1 meal/day/3L tank). Control (2 meal/day/3L). NAFLD zebrafish with no VitD added had higher level of fat compared with other groups. When NAFLD zebrafish were treated with either VitD or caloric restriction diet, fat level dropped to control level.

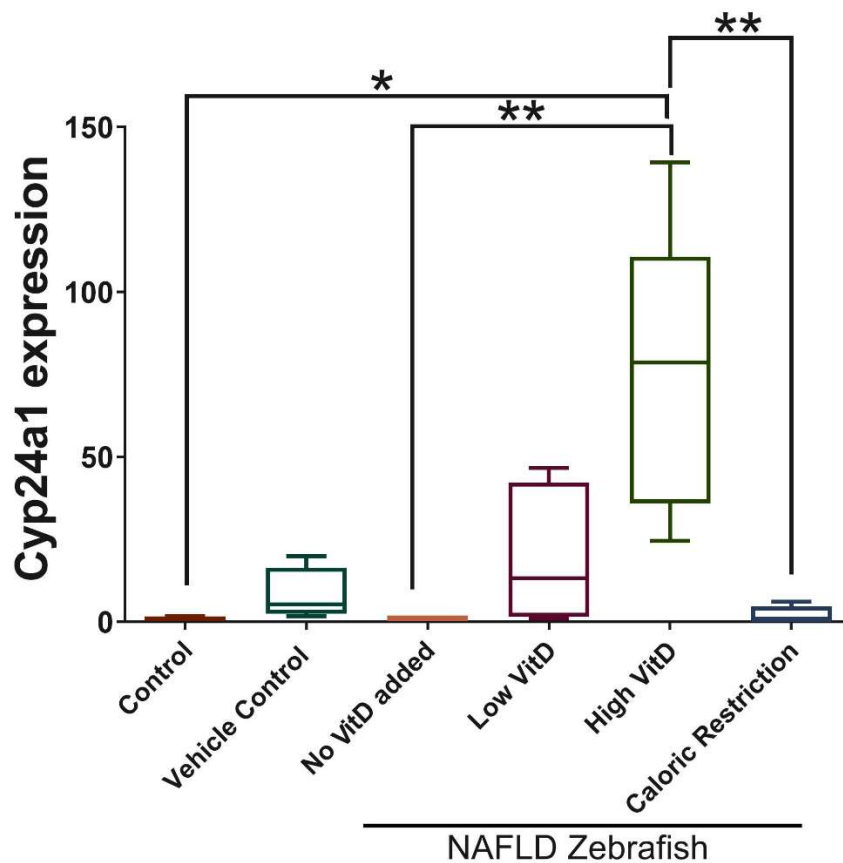

**Supplementary Figure S3. Relative expression levels of *cyp24a1* (a gene coding the VitD catalyzing enzyme) in zebrafish liver as measured by RT-qPCR.** Control and vehicle control groups were fed 2 times a day, and the same amount of ethanol used to dissolve VitD was added only to vehicle control group. NAFLD zebrafish were fed 3 times a day fish food with no VitD added, or low VitD (0.049  $\mu\text{g}$  meal/day/3L tank), or high VitD (1.25  $\mu\text{g}$  meal/day/3L tank). Caloric restriction group was fed fish food once a day. \*  $p < 0.05$ , \*\*  $p < 0.01$ .

| Gene             | log <sub>2</sub> (fold_change) | p_value | q_value |
|------------------|--------------------------------|---------|---------|
| dio3b            | 7.1                            | 0.0005  | 0.03    |
| <b>cyp24a1</b>   | 6.5                            | 0.0001  | 0.01    |
| gatm             | 5.9                            | 0.0001  | 0.01    |
| aqp9b            | 5.4                            | 0.0002  | 0.01    |
| <u>igfbp1b</u>   | 5.0                            | 0.0001  | 0.01    |
| zgc:171470       | 4.8                            | 0.0001  | 0.01    |
| gch2             | 4.2                            | 0.0001  | 0.01    |
| raver2           | 4.0                            | 0.0001  | 0.01    |
| mylipb           | 4.0                            | 0.0001  | 0.01    |
| ace              | 4.0                            | 0.0001  | 0.01    |
| LOC100149379     | 3.9                            | 0.0002  | 0.01    |
| cyp7a1a          | 3.9                            | 0.0001  | 0.01    |
| zgc:92137        | 3.9                            | 0.0001  | 0.01    |
| abcb11a          | 3.8                            | 0.0001  | 0.01    |
| hmgcra           | 3.6                            | 0.0001  | 0.01    |
| rgs2             | 3.5                            | 0.0001  | 0.01    |
| tbc1d32          | 3.5                            | 0.0006  | 0.04    |
| si:ch211-106h4.4 | 3.5                            | 0.0001  | 0.01    |
| LOC103910140     | 3.4                            | 0.0001  | 0.01    |
| sqlea            | 3.3                            | 0.0001  | 0.01    |
| slc16a12b        | 3.3                            | 0.0004  | 0.03    |
| LOC565702        | 3.3                            | 0.0001  | 0.01    |
| slc7a10a         | 3.3                            | 0.0001  | 0.01    |
| pltp             | 3.2                            | 0.0001  | 0.01    |
| <u>adamts1</u>   | 3.2                            | 0.0001  | 0.01    |
| si:ch73-330k17.3 | 3.2                            | 0.0001  | 0.01    |

|                    |     |        |      |
|--------------------|-----|--------|------|
| lss                | 3.1 | 0.0001 | 0.01 |
| cited2             | 3.1 | 0.0001 | 0.01 |
| LOC100536844       | 3.1 | 0.0001 | 0.01 |
| ela2               | 3.1 | 0.0001 | 0.01 |
| c6ast3             | 3.0 | 0.0001 | 0.01 |
| LOC571431          | 3.0 | 0.0001 | 0.01 |
| vtg4               | 3.0 | 0.0002 | 0.01 |
| LOC557756          | 3.0 | 0.0001 | 0.01 |
| LOC795897          | 2.9 | 0.0001 | 0.01 |
| mvda               | 2.9 | 0.0002 | 0.02 |
| si:ch211-222m15.19 | 2.9 | 0.0001 | 0.01 |
| apoa4a             | 2.9 | 0.0001 | 0.01 |
| sult1st1           | 2.9 | 0.0001 | 0.01 |
| zgc:92745          | 2.8 | 0.0001 | 0.01 |
| zgc:112368         | 2.8 | 0.0001 | 0.01 |
| LOC100330331       | 2.8 | 0.0005 | 0.03 |
| slc30a10           | 2.8 | 0.0001 | 0.01 |
| irg1               | 2.8 | 0.0002 | 0.01 |
| LOC100537376       | 2.8 | 0.0002 | 0.02 |
| cpo                | 2.7 | 0.0001 | 0.01 |
| itln3              | 2.7 | 0.0001 | 0.01 |
| egln3              | 2.6 | 0.0001 | 0.01 |
| alp3               | 2.6 | 0.0001 | 0.01 |
| vtg1               | 2.6 | 0.0001 | 0.01 |
| acsl1b             | 2.6 | 0.0001 | 0.01 |
| ddit4              | 2.6 | 0.0001 | 0.01 |
| LOC103910098       | 2.6 | 0.0001 | 0.01 |
| p4ha1b             | 2.6 | 0.0001 | 0.01 |
| LOC100536225       | 2.5 | 0.0001 | 0.01 |

|                   |     |        |      |
|-------------------|-----|--------|------|
| grn1              | 2.5 | 0.0001 | 0.01 |
| eno1a             | 2.5 | 0.0001 | 0.01 |
| ctrb1             | 2.5 | 0.0001 | 0.01 |
| si:dkey-57c15.4   | 2.5 | 0.0001 | 0.01 |
| si:ch73-103b2.3   | 2.5 | 0.0004 | 0.03 |
| zgc:112160        | 2.5 | 0.0001 | 0.01 |
| LOC568900         | 2.5 | 0.0001 | 0.01 |
| si:ch73-40a17.3   | 2.5 | 0.0001 | 0.01 |
| zgc:66382         | 2.5 | 0.0004 | 0.03 |
| si:dkey-14d8.6    | 2.5 | 0.0001 | 0.01 |
| zgc:92041         | 2.4 | 0.0004 | 0.03 |
| lygl1             | 2.4 | 0.0008 | 0.05 |
| LOC100334171      | 2.4 | 0.0001 | 0.01 |
| dnase1            | 2.4 | 0.0001 | 0.01 |
| ebp               | 2.4 | 0.0001 | 0.01 |
| pdzd3b            | 2.4 | 0.0001 | 0.01 |
| si:dkey-14d8.7    | 2.4 | 0.0001 | 0.01 |
| angptl2b          | 2.4 | 0.0001 | 0.01 |
| ela2l             | 2.3 | 0.0003 | 0.02 |
| si:ch211-240l19.6 | 2.3 | 0.0003 | 0.02 |
| LOC553228         | 2.3 | 0.0001 | 0.01 |
| LOC101886139      | 2.3 | 0.0001 | 0.01 |
| si:dkey-286j15.1  | 2.3 | 0.0001 | 0.01 |
| npc1l1            | 2.3 | 0.0001 | 0.01 |
| pglyrp6           | 2.2 | 0.0001 | 0.01 |
| si:ch211-240l19.5 | 2.2 | 0.0001 | 0.01 |
| dhcr7             | 2.2 | 0.0001 | 0.01 |
| lgals3bpb         | 2.2 | 0.0001 | 0.01 |
| cpa1              | 2.2 | 0.0001 | 0.01 |

|                   |     |        |      |
|-------------------|-----|--------|------|
| si:ch211-240l19.8 | 2.2 | 0.0004 | 0.03 |
| asah2             | 2.2 | 0.0001 | 0.01 |
| LOC100535194      | 2.2 | 0.0007 | 0.04 |
| sycn              | 2.2 | 0.0001 | 0.01 |
| ttc27             | 2.1 | 0.0004 | 0.03 |
| LOC797571         | 2.1 | 0.0007 | 0.04 |
| abca1b            | 2.1 | 0.0001 | 0.01 |
| LOC101883346      | 2.1 | 0.0001 | 0.01 |
| kpna2             | 2.1 | 0.0004 | 0.03 |
| mpv17l2           | 2.1 | 0.0005 | 0.03 |
| si:busm1-64d20.2  | 2.1 | 0.0001 | 0.01 |
| fdft1             | 2.1 | 0.0001 | 0.01 |
| fam151a           | 2.1 | 0.0001 | 0.01 |
| LOC101883241      | 2.1 | 0.0001 | 0.01 |
| amy2a             | 2.0 | 0.0001 | 0.01 |
| osgn1             | 2.0 | 0.0001 | 0.01 |
| cry-dash          | 2.0 | 0.0004 | 0.03 |
| fdps              | 2.0 | 0.0001 | 0.01 |
| zgc:153968        | 2.0 | 0.0003 | 0.02 |
| rdh12             | 2.0 | 0.0002 | 0.01 |
| ero1l             | 2.0 | 0.0001 | 0.01 |
| LOC569007         | 1.9 | 0.0004 | 0.03 |
| LOC559107         | 1.9 | 0.0001 | 0.01 |
| fep15             | 1.9 | 0.0008 | 0.05 |
| ctrl              | 1.9 | 0.0008 | 0.05 |
| slc15a1a          | 1.9 | 0.0003 | 0.02 |
| cry3              | 1.9 | 0.0001 | 0.01 |
| stoml3b           | 1.9 | 0.0004 | 0.03 |
| pyyb              | 1.9 | 0.0001 | 0.01 |



|                 |     |        |      |
|-----------------|-----|--------|------|
| slc22a21        | 1.9 | 0.0001 | 0.01 |
| cyp51           | 1.9 | 0.0003 | 0.02 |
| bhlhe41         | 1.8 | 0.0001 | 0.01 |
| slc5a8l         | 1.8 | 0.0001 | 0.01 |
| ano5a           | 1.8 | 0.0001 | 0.01 |
| si:dkey-30j10.5 | 1.8 | 0.0004 | 0.03 |
| LOC100331289    | 1.8 | 0.0003 | 0.02 |
| slc16a10        | 1.8 | 0.0008 | 0.05 |
| sepp1b          | 1.8 | 0.0008 | 0.05 |
| endou           | 1.8 | 0.0003 | 0.02 |
| LOC100001887    | 1.8 | 0.0001 | 0.01 |
| h2afvb          | 1.8 | 0.0004 | 0.03 |
| LOC100331208    | 1.7 | 0.0001 | 0.01 |
| sc5d            | 1.7 | 0.0001 | 0.01 |
| slc39a4         | 1.7 | 0.0006 | 0.04 |
| timp2a          | 1.7 | 0.0003 | 0.02 |
| si:dkeyp-73d8.9 | 1.7 | 0.0004 | 0.03 |
| cfr             | 1.7 | 0.0003 | 0.02 |
| fabp7b          | 1.7 | 0.0005 | 0.03 |
| mid1ip1l        | 1.7 | 0.0006 | 0.04 |
| zgc:165502      | 1.7 | 0.0002 | 0.02 |
| slc22a4         | 1.6 | 0.0003 | 0.02 |
| zgc:86599       | 1.6 | 0.0004 | 0.03 |
| zgc:66337       | 1.6 | 0.0002 | 0.01 |
| slc7a3a         | 1.6 | 0.0007 | 0.04 |
| wu:fb55g09      | 1.6 | 0.0002 | 0.02 |
| zgc:66484       | 1.6 | 0.0006 | 0.04 |
| alpi.2          | 1.6 | 0.0005 | 0.03 |
| sreb2           | 1.6 | 0.0004 | 0.03 |

|              |      |        |      |
|--------------|------|--------|------|
| LOC101883180 | 1.6  | 0.0002 | 0.02 |
| cox6a1       | 1.6  | 0.0002 | 0.02 |
| aqp8a.2      | 1.6  | 0.0005 | 0.03 |
| ilf2         | 1.5  | 0.0006 | 0.04 |
| cpox         | 1.5  | 0.0005 | 0.03 |
| klb          | 1.5  | 0.0008 | 0.05 |
| btr07        | 1.5  | 0.0008 | 0.05 |
| aldh4a1      | -1.4 | 0.0007 | 0.04 |
| pex3         | -1.5 | 0.0008 | 0.05 |
| crot         | -1.5 | 0.0007 | 0.04 |
| ddt          | -1.5 | 0.0006 | 0.04 |
| acad8        | -1.6 | 0.0006 | 0.04 |
| nr2f2        | -1.6 | 0.0004 | 0.03 |
| LOC100331428 | -1.6 | 0.0007 | 0.04 |
| hs pb8       | -1.6 | 0.0006 | 0.04 |
| cyp27a7      | -1.6 | 0.0003 | 0.02 |
| ptgdsa       | -1.6 | 0.0003 | 0.02 |
| slc12a4      | -1.6 | 0.0002 | 0.01 |
| zgc:193682   | -1.6 | 0.0003 | 0.02 |
| zgc:171500   | -1.6 | 0.0008 | 0.05 |
| ppp1r3cb     | -1.7 | 0.0002 | 0.02 |
| adrb2b       | -1.7 | 0.0005 | 0.03 |
| nid1a        | -1.7 | 0.0004 | 0.03 |
| ptplb        | -1.7 | 0.0005 | 0.03 |
| xdh          | -1.7 | 0.0002 | 0.02 |
| msrb1a       | -1.7 | 0.0001 | 0.01 |
| zgc:110783   | -1.7 | 0.0002 | 0.02 |
| LOC103912051 | -1.7 | 0.0004 | 0.03 |
| zgc:103678   | -1.7 | 0.0003 | 0.02 |

|                   |      |        |      |
|-------------------|------|--------|------|
| zgc:195173        | -1.7 | 0.0004 | 0.03 |
| LOC103911503      | -1.7 | 0.0001 | 0.01 |
| slco1d1           | -1.8 | 0.0007 | 0.04 |
| si:dkey-58f10.11  | -1.8 | 0.0001 | 0.01 |
| hgd               | -1.8 | 0.0007 | 0.04 |
| zmp:0000000758    | -1.8 | 0.0001 | 0.01 |
| zgc:92040         | -1.8 | 0.0003 | 0.02 |
| slc43a1b          | -1.8 | 0.0002 | 0.01 |
| si:ch211-188c16.1 | -1.8 | 0.0002 | 0.02 |
| LOC100002960      | -1.8 | 0.0005 | 0.03 |
| gys2              | -1.8 | 0.0002 | 0.01 |
| amdhd1            | -1.8 | 0.0001 | 0.01 |
| igf2b             | -1.9 | 0.0002 | 0.01 |
| urad              | -1.9 | 0.0001 | 0.01 |
| LOC100537915      | -1.9 | 0.0004 | 0.03 |
| LOC100330440      | -1.9 | 0.0001 | 0.01 |
| sirt3             | -1.9 | 0.0005 | 0.03 |
| pxmp2             | -1.9 | 0.0001 | 0.01 |
| bnip3             | -1.9 | 0.0001 | 0.01 |
| ces2              | -1.9 | 0.0008 | 0.05 |
| tldc1             | -1.9 | 0.0002 | 0.02 |
| si:dkey-65b13.9   | -1.9 | 0.0006 | 0.04 |
| zgc:153031        | -1.9 | 0.0001 | 0.01 |
| LOC100332592      | -1.9 | 0.0006 | 0.04 |
| map4k2            | -1.9 | 0.0002 | 0.01 |
| foxa2             | -2.0 | 0.0001 | 0.01 |
| zgc:165582        | -2.0 | 0.0001 | 0.01 |
| h1fx              | -2.0 | 0.0001 | 0.01 |
| LOC797311         | -2.0 | 0.0003 | 0.02 |

|                   |      |        |      |
|-------------------|------|--------|------|
| irg1l             | -2.0 | 0.0002 | 0.02 |
| si:dkeyp-89c11.2  | -2.0 | 0.0002 | 0.01 |
| robo2             | -2.0 | 0.0002 | 0.01 |
| slco2a1           | -2.0 | 0.0001 | 0.01 |
| cetp              | -2.0 | 0.0003 | 0.02 |
| si:ch211-222e20.4 | -2.0 | 0.0004 | 0.03 |
| abcb11b           | -2.0 | 0.0002 | 0.01 |
| adka              | -2.0 | 0.0001 | 0.01 |
| tfcpl1            | -2.0 | 0.0005 | 0.03 |
| LOC100330415      | -2.0 | 0.0002 | 0.01 |
| acsbgl            | -2.1 | 0.0004 | 0.03 |
| zbtb20            | -2.1 | 0.0004 | 0.03 |
| cat               | -2.1 | 0.0005 | 0.03 |
| slc25a32a         | -2.1 | 0.0001 | 0.01 |
| adh8a             | -2.1 | 0.0006 | 0.04 |
| si:dkey-9i23.8    | -2.1 | 0.0003 | 0.02 |
| ppp1r3b           | -2.1 | 0.0004 | 0.03 |
| si:busm1-266f07.2 | -2.1 | 0.0001 | 0.01 |
| igf2a             | -2.1 | 0.0001 | 0.01 |
| pls3              | -2.1 | 0.0001 | 0.01 |
| krt91             | -2.1 | 0.0003 | 0.02 |
| agpat9            | -2.1 | 0.0001 | 0.01 |
| slc16a13          | -2.1 | 0.0002 | 0.01 |
| angptl3           | -2.1 | 0.0007 | 0.04 |
| zgc:112315        | -2.1 | 0.0001 | 0.01 |
| bag3              | -2.1 | 0.0001 | 0.01 |
| slc43a3b          | -2.2 | 0.0003 | 0.02 |
| inpp5f            | -2.2 | 0.0001 | 0.01 |
| rnasel3           | -2.2 | 0.0006 | 0.04 |

|                  |      |        |      |
|------------------|------|--------|------|
| bcat2            | -2.2 | 0.0007 | 0.04 |
| histh1l          | -2.2 | 0.0001 | 0.01 |
| mbnl3            | -2.2 | 0.0001 | 0.01 |
| LOC566131        | -2.2 | 0.0005 | 0.03 |
| rbp2b            | -2.2 | 0.0001 | 0.01 |
| alas2            | -2.2 | 0.0001 | 0.01 |
| ugt5e1           | -2.2 | 0.0005 | 0.03 |
| rwdd             | -2.3 | 0.0006 | 0.04 |
| slc25a36a        | -2.3 | 0.0001 | 0.01 |
| LOC100535291     | -2.3 | 0.0001 | 0.01 |
| si:ch211-276k2.2 | -2.3 | 0.0007 | 0.04 |
| dpys             | -2.3 | 0.0001 | 0.01 |
| miox             | -2.4 | 0.0001 | 0.01 |
| cmpk2            | -2.4 | 0.0003 | 0.02 |
| urah             | -2.4 | 0.0001 | 0.01 |
| ccrn4la          | -2.4 | 0.0001 | 0.01 |
| pbld1            | -2.4 | 0.0001 | 0.01 |
| mgea5            | -2.4 | 0.0001 | 0.01 |
| ate1             | -2.4 | 0.0007 | 0.04 |
| col5a1           | -2.4 | 0.0002 | 0.01 |
| hbaa1            | -2.4 | 0.0005 | 0.03 |
| LOC103911768     | -2.4 | 0.0004 | 0.03 |
| cahz             | -2.4 | 0.0001 | 0.01 |
| ba1l             | -2.4 | 0.0002 | 0.01 |
| zgc:123275       | -2.4 | 0.0001 | 0.01 |
| msrb2            | -2.4 | 0.0001 | 0.01 |
| cyp39a1          | -2.4 | 0.0001 | 0.01 |
| zmp:0000001078   | -2.4 | 0.0001 | 0.01 |
| LOC103909258     | -2.5 | 0.0001 | 0.01 |

|                |      |        |      |
|----------------|------|--------|------|
| rsad2          | -2.5 | 0.0001 | 0.01 |
| slc4a1a        | -2.5 | 0.0003 | 0.02 |
| LOC100332418   | -2.5 | 0.0001 | 0.01 |
| zgc:161973     | -2.6 | 0.0001 | 0.01 |
| rnd1l          | -2.6 | 0.0001 | 0.01 |
| atp2a1l        | -2.6 | 0.0007 | 0.04 |
| epb41b         | -2.6 | 0.0001 | 0.01 |
| pebp1          | -2.6 | 0.0001 | 0.01 |
| abhd3          | -2.6 | 0.0002 | 0.02 |
| ces3           | -2.6 | 0.0001 | 0.01 |
| mpx            | -2.7 | 0.0001 | 0.01 |
| wu:fd44f11     | -2.7 | 0.0001 | 0.01 |
| LOC100535383   | -2.7 | 0.0001 | 0.01 |
| LOC101887004   | -2.7 | 0.0005 | 0.03 |
| si:dkey-71h2.2 | -2.7 | 0.0002 | 0.01 |
| camk2n1a       | -2.7 | 0.0001 | 0.01 |
| me1            | -2.7 | 0.0001 | 0.01 |
| LOC100332947   | -2.7 | 0.0001 | 0.01 |
| LOC101886683   | -2.7 | 0.0006 | 0.04 |
| nr0b1          | -2.7 | 0.0001 | 0.01 |
| sult2st3       | -2.7 | 0.0004 | 0.03 |
| cry2a          | -2.7 | 0.0007 | 0.04 |
| LOC100537842   | -2.7 | 0.0001 | 0.01 |
| LOC565454      | -2.8 | 0.0005 | 0.03 |
| LOC793037      | -2.9 | 0.0001 | 0.01 |
| ppdpfb         | -2.9 | 0.0001 | 0.01 |
| cyp8b3         | -3.0 | 0.0008 | 0.05 |
| zgc:194626     | -3.0 | 0.0006 | 0.04 |
| ba1            | -3.0 | 0.0001 | 0.01 |

|                   |      |        |      |
|-------------------|------|--------|------|
| cldn11a           | -3.1 | 0.0006 | 0.04 |
| si:ch211-171h4.3  | -3.1 | 0.0001 | 0.01 |
| cpeb4             | -3.2 | 0.0001 | 0.01 |
| ypel3             | -3.2 | 0.0001 | 0.01 |
| wu:fi74c02        | -3.2 | 0.0001 | 0.01 |
| zgc:86725         | -3.2 | 0.0001 | 0.01 |
| LOC101883275      | -3.2 | 0.0001 | 0.01 |
| cyp2ae1           | -3.2 | 0.0003 | 0.02 |
| igfbp2b           | -3.2 | 0.0001 | 0.01 |
| sc:d0202          | -3.2 | 0.0001 | 0.01 |
| lpin1             | -3.2 | 0.0005 | 0.03 |
| tor3a             | -3.2 | 0.0001 | 0.01 |
| mfsd2ab           | -3.3 | 0.0001 | 0.01 |
| wu:fi27h03        | -3.3 | 0.0005 | 0.03 |
| spp2              | -3.3 | 0.0001 | 0.01 |
| LOC100538158      | -3.3 | 0.0001 | 0.01 |
| tubb5             | -3.4 | 0.0001 | 0.01 |
| c1qtnf1           | -3.4 | 0.0001 | 0.01 |
| acta1a            | -3.4 | 0.0001 | 0.01 |
| Lipg              | -3.5 | 0.0004 | 0.03 |
| zgc:171534        | -3.5 | 0.0001 | 0.01 |
| cry2a             | -3.6 | 0.0001 | 0.01 |
| zgc:92880         | -3.7 | 0.0001 | 0.01 |
| si:dkey-22f5.9    | -3.7 | 0.0001 | 0.01 |
| trmt10b           | -3.8 | 0.0002 | 0.01 |
| spam1             | -3.9 | 0.0001 | 0.01 |
| mhc2dab           | -3.9 | 0.0001 | 0.01 |
| si:ch211-175f11.5 | -4.0 | 0.0001 | 0.01 |
| ggact.1           | -4.1 | 0.0002 | 0.02 |

|                   |      |        |      |
|-------------------|------|--------|------|
| si:ch211-5k11.6   | -4.2 | 0.0001 | 0.01 |
| elovl6            | -4.2 | 0.0001 | 0.01 |
| zgc:73273         | -4.2 | 0.0001 | 0.01 |
| si:dkey-18p12.4   | -4.3 | 0.0001 | 0.01 |
| Mia               | -4.3 | 0.0001 | 0.01 |
| krt5              | -4.4 | 0.0001 | 0.01 |
| aldh1l1           | -4.5 | 0.0001 | 0.01 |
| slc12a10.3        | -4.8 | 0.0001 | 0.01 |
| LOC567192         | -4.8 | 0.0001 | 0.01 |
| dr1               | -5.0 | 0.0001 | 0.01 |
| si:busm1-160c18.6 | -5.0 | 0.0001 | 0.01 |
| hsc70             | -5.2 | 0.0001 | 0.01 |
| dio2              | -5.2 | 0.0001 | 0.01 |
| LOC100329520      | -5.7 | 0.0007 | 0.04 |
| igf1              | -5.7 | 0.0001 | 0.01 |
| zgc:172271        | -5.9 | 0.0001 | 0.01 |

**Supplementary Table S1.** Differentially and significantly expressed genes following transcriptomic analysis of NAFLD treated with high VitD compared to NAFLD untreated control.



| Gene               | Primer Sequence (5'-3')         |
|--------------------|---------------------------------|
| ef1α<br>(eef1a1l1) | 5'-CGTCTGCCACTTCAGCATGTG-3'     |
|                    | 5'- ACTTGCAGGCGATGTGAGCAG-3'    |
| adh8a              | 5'-CGAGTACACCGTCATCAAC-3'       |
|                    | 5'-AGCACCGAGTCCGAATAC-3'        |
| ddt                | 5'-GTGGTAAAGCCTGACCTGCC-3'      |
|                    | 5'-TGTGATGGCTCCAGAGGGTAA-3'     |
| rbp2b              | 5'-CAACAGGGCATTGAAGACTCTGG-3'   |
|                    | 5'- TCCCCGATTGGCTTTCTCACCC-3'   |
| histh1l            | 5'-CTACCTCTGTACCTGATACACAAA-3'  |
|                    | 5'-GGACATATTGGACACTTTCC-3'      |
| apoc2              | 5'- AAGGGAACCATCGCTGTTGT        |
|                    | 5'- GCTGGTCTTGAAAGATGCCG        |
| h1fx               | 5'- AAAACGGCTCGTCGCTTTTC-3'     |
|                    | 5'- TTGGCTCCGAATCCCTTCAC-3'     |
| dio2               | 5'- GGATGAGTCGGAAGGTGAA-3'      |
|                    | 5'- CCACACTAAGCAAGCCCATT-3'     |
| aldh1a1            | 5'- GGACTGGACACAGGACCAAT-3'     |
|                    | 5'- AGGAAGCGCTTGTAGATGCT-3'     |
| apoc4              | 5'- TGCTTGACCTTGTCCAACCC-3'     |
|                    | 5'- TAACCAGCCACTGTCTTTGCC-3'    |
| cyp24a             | 5'-AAAAGTCAACGGCAAAATGG-3'      |
|                    | 5'-GTGTGGTCCTTCCACGTCTT-3'      |
| ces1               | 5'- ATACCCTCCATCAAAGTTGCGT-3'   |
|                    | 5'- TGTAACCTTTCACCTGACCATCCC-3' |

**Supplementary Table S2.** Differentially expressed genes by RNA-sequencing between (A) NAFLD untreated and treated with high VitD and NAFLD and vehicle-control groups

### Molecular Functions

|   | ID         | Name                        | pValue   | FDR B&H | FDR B&Y | Bonferroni |
|---|------------|-----------------------------|----------|---------|---------|------------|
| 1 | GO:0005344 | oxygen transporter activity | 0.000002 | 0.0003  | 0.002   | 0.0003     |
| 2 | GO:0031721 | hemoglobin alpha binding    | 0.000008 | 0.0008  | 0.005   | 0.002      |
| 3 | GO:0030492 | hemoglobin binding          | 0.00008  | 0.004   | 0.02    | 0.02       |
| 4 | GO:0019825 | oxygen binding              | 0.0001   | 0.004   | 0.02    | 0.02       |
| 5 | GO:0005506 | iron ion binding            | 0.0002   | 0.006   | 0.03    | 0.03       |
| 6 | GO:0016491 | oxidoreductase activity     | 0.0002   | 0.007   | 0.04    | 0.04       |

### GO: Biological Process

|   | ID         | Name                                  | pValue   | FDR B&H | FDR B&Y | Bonferroni |
|---|------------|---------------------------------------|----------|---------|---------|------------|
| 1 | GO:0015671 | oxygen transport                      | 0.000002 | 0.002   | 0.01    | 0.002      |
| 2 | GO:0055114 | oxidation-reduction process           | 0.000004 | 0.002   | 0.01    | 0.004      |
| 3 | GO:0019752 | carboxylic acid metabolic process     | 0.000004 | 0.002   | 0.01    | 0.005      |
| 4 | GO:0032787 | monocarboxylic acid metabolic process | 0.000007 | 0.002   | 0.01    | 0.008      |
| 5 | GO:0015669 | gas transport                         | 0.000008 | 0.002   | 0.01    | 0.009      |
| 6 | GO:0043436 | oxoacid metabolic process             | 0.00001  | 0.002   | 0.01    | 0.012      |
| 7 | GO:0044712 | single-organism catabolic process     | 0.00001  | 0.002   | 0.01    | 0.012      |

### Pathways: BioSystems/REACTOME

|   | ID      | Name                                         | pValue | FDR B&H | FDR B&Y | Bonferroni |
|---|---------|----------------------------------------------|--------|---------|---------|------------|
| 1 | 1270190 | Phase 1 - Functionalization of compounds     | 0.0001 | 0.01    | 0.07    | 0.03       |
| 2 | 1269630 | Signaling by Retinoic Acid                   | 0.0001 | 0.01    | 0.07    | 0.04       |
| 3 | 1270002 | Lipid digestion, mobilization, and transport | 0.0001 | 0.01    | 0.07    | 0.04       |
| 4 | 1270189 | Biological oxidation                         | 0.0002 | 0.01    | 0.07    | 0.05       |

### Gene Families ([acc. to genenames.org](http://acc.to/genenames.org))

|  | ID | Name | pValue | FDR B&H | FDR B&Y | Bonferroni |
|--|----|------|--------|---------|---------|------------|
|--|----|------|--------|---------|---------|------------|

|   |     |                                         |           |          |          |          |
|---|-----|-----------------------------------------|-----------|----------|----------|----------|
| 1 | 940 | Hemoglobin subunits                     | 0.0000002 | 0.000003 | 0.000009 | 0.000003 |
| 2 | 461 | Carboxylesterases                       | 0.00001   | 0.0001   | 0.0003   | 0.0002   |
| 3 | 550 | Fatty acid binding protein family       | 0.0002    | 0.0008   | 0.003    | 0.002    |
| 4 | 405 | Apolipoproteins                         | 0.0003    | 0.001    | 0.004    | 0.004    |
| 5 | 864 | Histones                                | 0.0004    | 0.001    | 0.004    | 0.005    |
| 6 | 591 | CD molecules   C1-set domain containing | 0.001     | 0.003    | 0.01     | 0.02     |

**Supplementary Table S3.** Top pathways differentially expressed in NAFLD supplemented with high VitD compared to non-VitD supplemented zebrafish. Significant according to Bonferroni-adjusted p-value ( $<0.05$ ). B&H - Benjamini and Hochberg; B&Y - Benjamini and Yekutieli's FDR

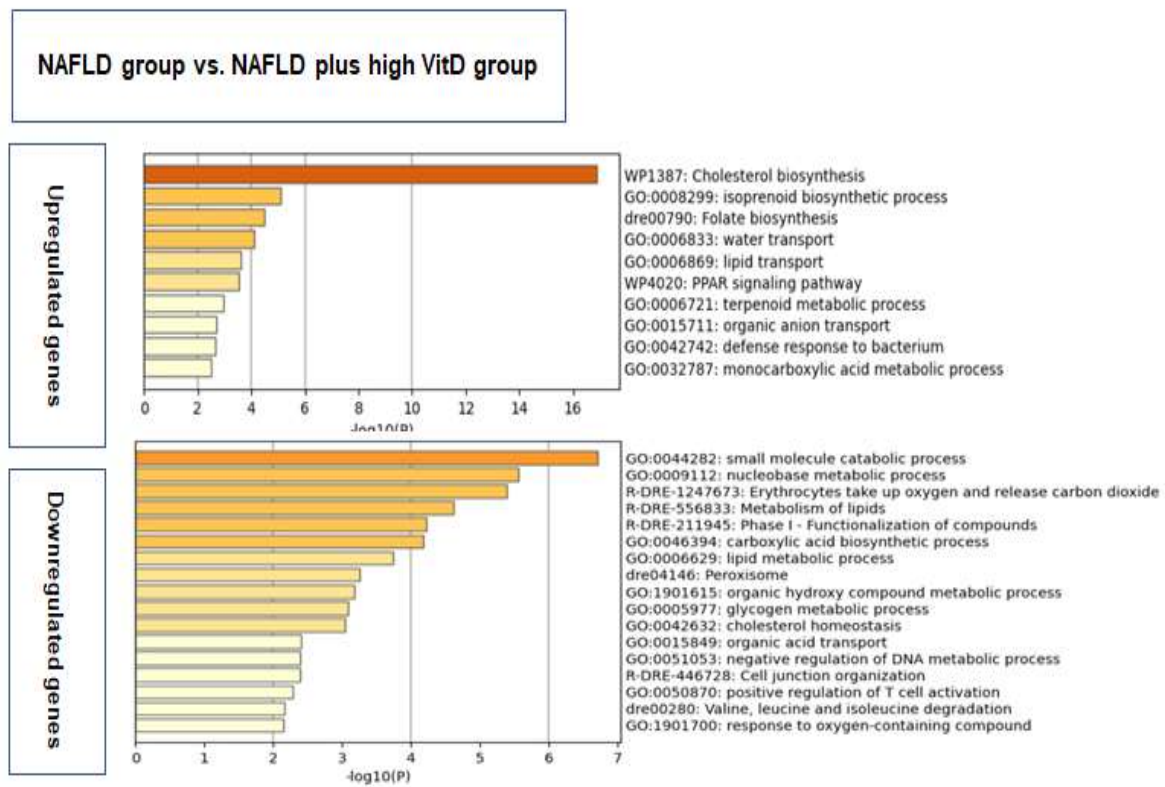

**Supplementary Figure S4.** Metascape pathway analysis [39] of top differentially expressed genes (listed in supplementary table 1) of NAFLD Zebrafish following high VitD diet compared to NAFLD untreated control.
